# Supplementary material for: Clathrin in Chara australis: Molecular Analysis and Involvement in Charasome Degradation and Constitutive Endocytosis
Source: PubMed Central journal article supplement (PMC5266738; doi:10.3389/fpls.2017.00020), 2017-01-26
Supplement: Image1.pdf [file Image1.pdf]

## Supplementary Material

### Clathrin in *Chara australis*: Molecular Analysis and Involvement in Charasome Degradation and Constitutive Endocytosis

Marion C. Hoepflinger\*, Margit Hoeflberger, Aniel Sommer, Christina Hametner, Ilse Foissner\*

\* Correspondence: Marion C. Hoepflinger: [Marion.Hoepflinger2@sbg.ac.at](mailto:Marion.Hoepflinger2@sbg.ac.at)  
Ilse Foissner: [Ilse.Foissner@sbg.ac.at](mailto:Ilse.Foissner@sbg.ac.at)

#### 1.1 Supplementary Figure

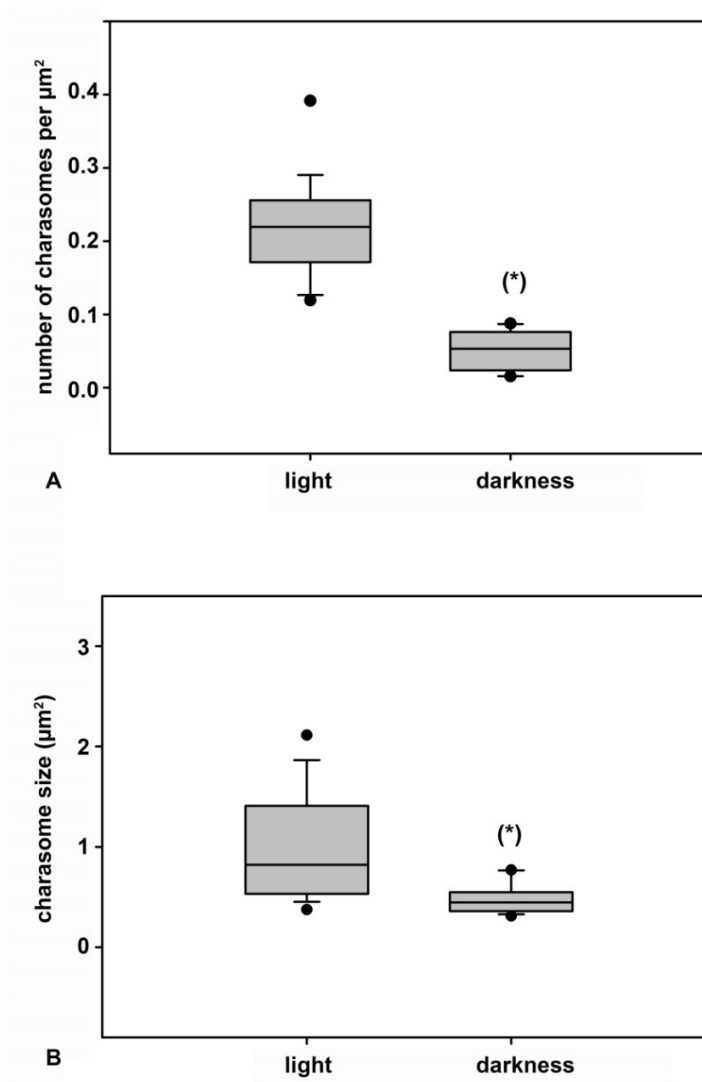

**Supplementary Figure 1.** Effect of dark incubation on relative charasome number (A) and on charasome size (B) in branchlet internodal cells of *C. australis*. Cells were incubated in darkness for 12 days, controls were exposed to standard light/dark conditions for 12 days. The box-and-whisker plots show the median values with upper and lower quartiles (boxes), whiskers indicating the 10<sup>th</sup> and 90<sup>th</sup> percentiles, and outliers (dots) with n = 18 (for dark incubated cells) and 19 (for cells exposed to standard light/dark conditions). Differences between median values of control and treated cells are significant (asterisks; Mann-Whitney Rank Sum Test,  $P \leq 0.001$ ).
