# Supplementary material for: Clathrin in Chara australis: Molecular Analysis and Involvement in Charasome Degradation and Constitutive Endocytosis
Source: PubMed Central journal article supplement (PMC5266738; doi:10.3389/fpls.2017.00020), 2017-01-26
Supplement: Image3.pdf [file Image3.pdf]

## Supplementary Material

### Clathrin in *Chara australis*: Molecular Analysis and Involvement in Charasome Degradation and Constitutive Endocytosis

Marion C. Hoepflinger\*, Margit Hoefftberger, Aniel Sommer, Christina Hametner, Ilse Foissner\*

\* Correspondence: Marion C. Hoepflinger: [Marion.Hoepflinger2@sbg.ac.at](mailto:Marion.Hoepflinger2@sbg.ac.at)  
Ilse Foissner: [Ilse.Foissner@sbg.ac.at](mailto:Ilse.Foissner@sbg.ac.at)

#### 1.1 Supplementary Figure

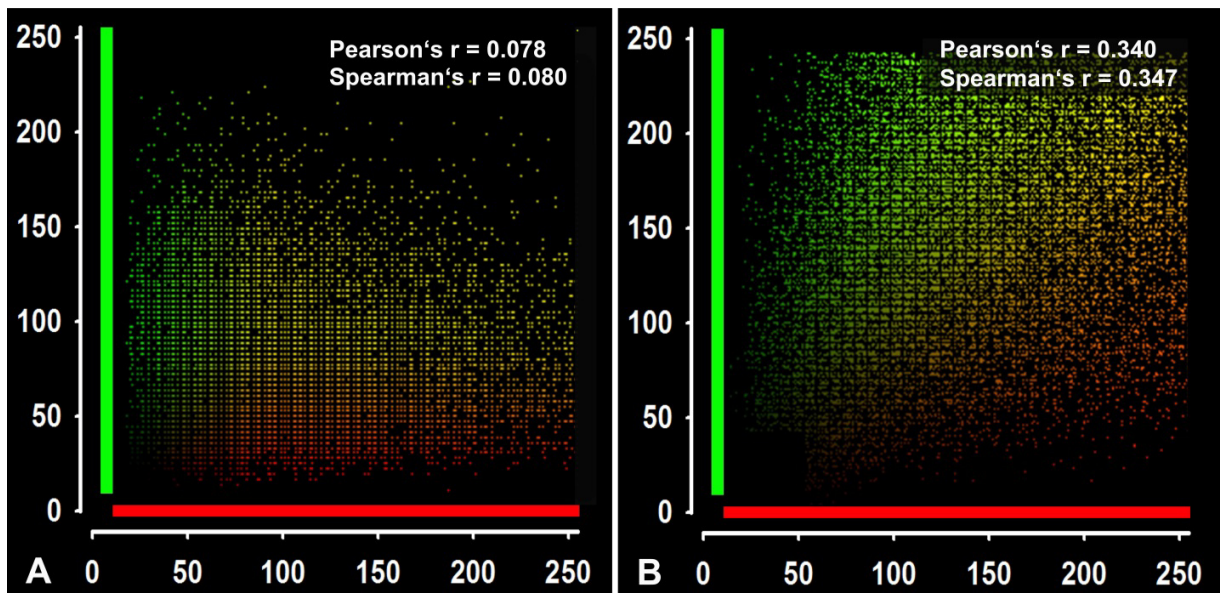

**Supplementary Figure 3.** Colocalization of charasomes and clathrin epitopes was quantified using the JACoP plugin of ImageJ (French et al., 2008). The scatterplots show the fluorescence intensities (0–254) for each pixel (y-axis = green anti-clathrin fluorescence, x-axis = red charasome fluorescence). Note the absence of colocalization in cells exposed to standard light/dark conditions (A) and partial colocalization after 3 days dark incubation (B). Data are based on measurements from 380 (A) and 257 (B) fluorescent structures, respectively.

Reference:

French, A. P., Mills, S., Swarup, R., Bennett, M. J., and Pridmore, T. P. (2008). Colocalization of fluorescent markers in confocal microscope images of plant cells. *Nat. Protocols* 3(4), 619–628.
